# Supplementary material for: The Covid-19 pandemic and mental health of first-year college students: Examining the effect of Covid-19 stressors using longitudinal data
Source: PubMed Central journal article supplement (PMC7935268; doi:10.1371/journal.pone.0247999), 2021-03-05
Supplement: pone.0247999.s001.pdf [file pone.0247999.s001.pdf]

S1 Table. Ordinary least squares (OLS) regression estimates for levels of and changes in severity of anxiety and depression symptoms among the Transitions Study longitudinal sample (N=419).

|                                                 | Anxiety (GAD-7)                    |                                    | Depression (PHQ-8)                 |                                    |
|-------------------------------------------------|------------------------------------|------------------------------------|------------------------------------|------------------------------------|
|                                                 | Symptoms                           | Changes in Symptoms                | Symptoms                           | Changes in Symptoms                |
|                                                 | OLS<br>Beta<br>(s.e.) <sup>a</sup> | OLS<br>Beta<br>(s.e.) <sup>a</sup> | OLS<br>Beta<br>(s.e.) <sup>a</sup> | OLS<br>Beta<br>(s.e.) <sup>a</sup> |
| Employed (Wave I)                               | -0.231**<br>0.109                  | -0.226*<br>0.137                   | -0.280***<br>0.098                 | -0.222*<br>0.120                   |
| x Work reduction (student)                      | 0.187<br>0.126                     | 0.226<br>0.157                     | 0.202*<br>0.122                    | 0.160<br>0.143                     |
| Work reduction (parent)                         | 0.010<br>0.089                     | 0.030<br>0.105                     | 0.114<br>0.082                     | 0.143<br>0.099                     |
| Distanced learning                              | 0.205***<br>0.053                  | 0.083<br>0.056                     | 0.190***<br>0.045                  | 0.100**<br>0.051                   |
| Education technology                            | 0.017<br>0.042                     | 0.008<br>0.047                     | -0.027<br>0.040                    | -0.009<br>0.044                    |
| Covid-19 diagnosis                              | 0.098<br>0.102                     | 0.057<br>0.122                     | 0.052<br>0.095                     | -0.031<br>0.107                    |
| Covid-19 hospitalization                        | 0.110<br>0.154                     | 0.195<br>0.181                     | 0.005<br>0.169                     | 0.067<br>0.200                     |
| Social isolation (Wave II)                      | 0.605***<br>0.102                  | 0.463***<br>0.127                  | 0.629***<br>0.100                  | 0.469***<br>0.111                  |
| Mental health (Wave I)                          | 0.358***<br>0.060                  |                                    | 0.424***<br>0.060                  |                                    |
| Social isolation (Wave I)                       | -0.278**<br>0.117                  | -0.501***<br>0.145                 | -0.122<br>0.124                    | -0.484***<br>0.149                 |
| $R^2$                                           | 0.457                              | 0.142                              | 0.534                              | 0.166                              |
| <u>Joint significance of Covid-19 Stressors</u> |                                    |                                    |                                    |                                    |
| $p$ -value                                      | 0.001                              | 0.254                              | 0.000                              | 0.123                              |

<sup>a</sup>Abbreviations: standard errors, s.e.

Note: All models control for students' psychological resources and social support measures listed in Table 1, missing indicators for psychological resources and social support measures, race, gender, Sexual/gender minority identity, first-generation college student status, age, free/reduced priced-lunch, the week in which the student responded to Wave II, and a constant.

\*\*\*  $p < 0.001$ , \*\*  $p < 0.05$ , \*  $p < 0.1$
